# Supplementary material
Source: PubMed Central journal article supplement (PMC9363456)
Supplement: 41467_2022_32250_MOESM1_ESM.pdf [file 41467_2022_32250_MOESM1_ESM.pdf]

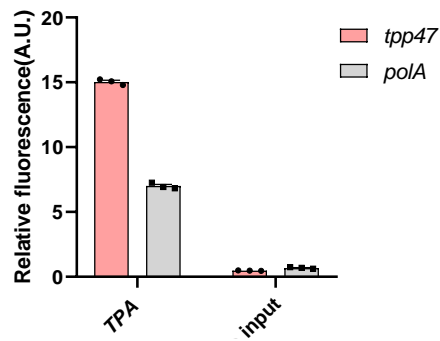

**Figure S1. Fluorescence measurement of *tpp47* and *polA* for *Treponema pallidum* DNA.** The PCR-LwCas13a assay produces a higher fluorescence value for *tpp47* than for *polA* after 180 min. n = 3 technical replicates; error bars represent mean  $\pm$  SEM. Abbreviations: A.U., Arbitrary units. Source data are provided as a Source Data file.

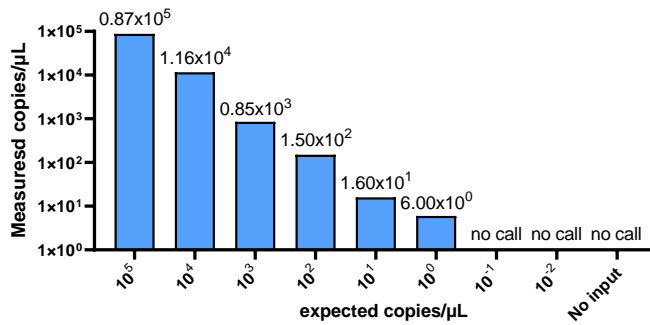

**Figure S2. Quantification of *tpp47* dsDNA template by droplet digital PCR (ddPCR).** Serially diluted aliquots of the *tpp47* dsDNA template were quantified by ddPCR. The X-axis represents expected concentration, and the Y-axis represents measured concentration. The measured value is labeled above the bar chart. Source data are provided as a Source Data file.

a

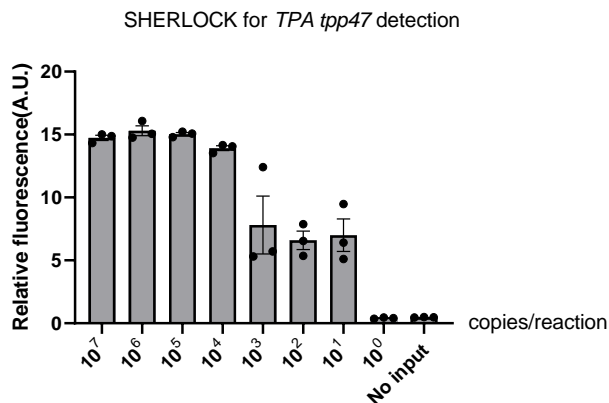

b

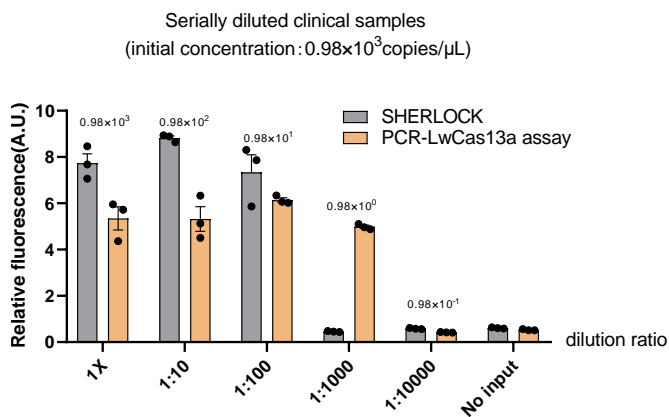

**Figure S3. Performance of SHERLOCK for *TPA tpp47* detection.** **a** SHERLOCK exhibits a limit of detection of 10 copies/reaction for *TPA tpp47*. **b** Head-to-head comparison of SHERLOCK and the PCR-LwCas13a assay using serially diluted clinical samples.  $n = 3$  technical replicates; error bars represent mean  $\pm$  SEM. Abbreviations: A.U., Arbitrary units. Source data are provided as a Source Data file.

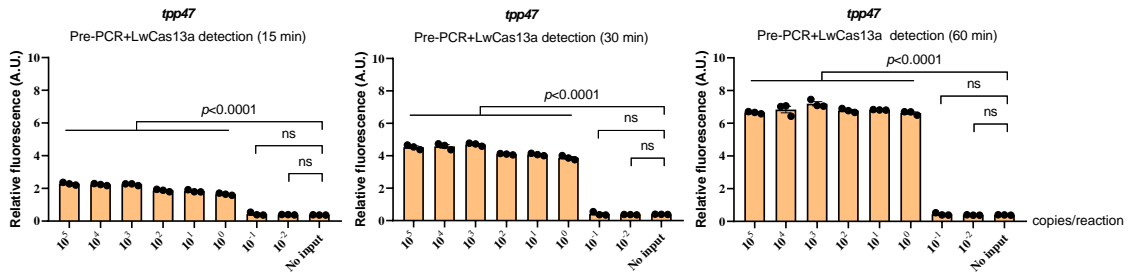

**Figure S4. Fluorescence measurement of *tpp47* dsDNA detection using different LwCas13a detection incubation times.** Series diluted aliquots of the *tpp47* dsDNA template were pre-amplified by PCR, followed by 15 min, 30 min, and 60 min LwCas13a detection.  $n = 3$  technical replicates; error bars represent mean  $\pm$  SEM. Two-tailed Student t-test was used to analyze the statistical significance;  $p$  value was labeled on figures, ns = not significant. Abbreviations: A.U., Arbitrary units. Source data are provided as a Source Data file.

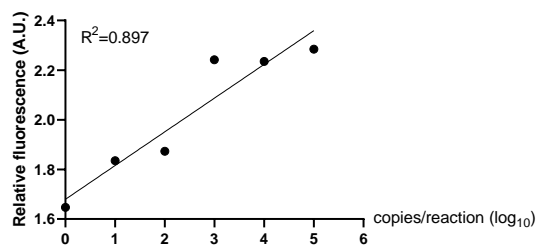

**Figure S5. Correlation of copies number of *tpp47* dsDNA with detected fluorescence.** Serially diluted aliquots of *tpp47* dsDNA template were pre-amplified by PCR. Fluorescence signals were measured after 15 min of LwCas13a detection. n = 3 technical replicates; values represent mean. Abbreviations: A.U., Arbitrary units. Source data are provided as a Source Data file.

**a**

Nichols: TAAAAACAAACAGTTGCCAAGTCCGAACACCTCAATCCGGC  
 DAL-1: TAAAAACAAACAGTTGCCAAGTCCGAACACCTCAATCCGGC  
 Chicago: TAAAAACAAACAGTTGCCAAGTCCGAACACCTCAATCCGGC  
 Sea 81-4: TAAAAACAAACAGTTGCCAAGTCCGAACACCTCAATCCGGC  
 CW86: TAAAAACAAACAGTTGCCAAGTCCGAACACCTCAATCCGGC  
 CW83: TAAAAACAAACAGTTGCCAAGTCCGAACACCTCAATCCGGC  
 CW65: TAAAAACAAACAGTTGCCAAGTCCGAACACCTCAATCCGGC  
 CW59: TAAAAACAAACAGTTGCCAAGTCCGAACACCTCAATCCGGC  
 CW82: TAAAAACAAACAGTTGCCAAGTCCGAACACCTCAATCCGGC  
 Seattle\_Nichols: TAAAAACAAACAGTTGCCAAGTCCGAACACCTCAATCCGGC  
 Chicago\_population: TAAAAACAAACAGTTGCCAAGTCCGAACACCTCAATCCGGC  
 CDC-A: TAAAAACAAACAGTTGCCAAGTCCGAACACCTCAATCCGGC  
 Houston\_Nichols\_clone\_E: TAAAAACAAACAGTTGCCAAGTCCGAACACCTCAATCCGGC  
 Houston\_Nichols\_clone\_J: TAAAAACAAACAGTTGCCAAGTCCGAACACCTCAATCCGGC  
 UW189B: TAAAAACAAACAGTTGCCAAGTCCGAACACCTCAATCCGGC  
 Haiti\_B: TAAAAACAAACAGTTGCCAAGTCCGAACACCTCAATCCGGC  
 SMUTp\_07: TAAAAACAAACAGTTGCCAAGTCCGAACACCTCAATCCGGC

SS14: TAAAAACAAAGGATAGCGAGCTCAACACCTCAATCCGGC  
 Mexico\_A: TAAAAACAAAGGATAGCGAGCTCAACACCTCAATCCGGC  
 UZ1974: TAAAAACAAAGGATAGCGAGCTCAACACCTCAATCCGGC  
 CW88: TAAAAACAAAGGATAGCGAGCTCAACACCTCAATCCGGC  
 CW87: TAAAAACAAAGGATAGCGAGCTCAACACCTCAATCCGGC  
 CW85: TAAAAACAAAGGATAGCGAGCTCAACACCTCAATCCGGC  
 CW84: TAAAAACAAAGGATAGCGAGCTCAACACCTCAATCCGGC  
 CW56: TAAAAACAAAGGATAGCGAGCTCAACACCTCAATCCGGC  
 CW30: TAAAAACAAAGGATAGCGAGCTCAACACCTCAATCCGGC  
 UW074B: TAAAAACAAAGGATAGCGAGCTCAACACCTCAATCCGGC  
 UW228B: TAAAAACAAAGGATAGCGAGCTCAACACCTCAATCCGGC  
 UW254B: TAAAAACAAAGGATAGCGAGCTCAACACCTCAATCCGGC  
 UW391B: TAAAAACAAAGGATAGCGAGCTCAACACCTCAATCCGGC  
 Grady: TAAAAACAAAGGATAGCGAGCTCAACACCTCAATCCGGC  
 Philadelphia\_1: TAAAAACAAAGGATAGCGAGCTCAACACCTCAATCCGGC  
 X-4: TAAAAACAAAGGATAGCGAGCTCAACACCTCAATCCGGC  
 UW-148B2: TAAAAACAAAGGATAGCGAGCTCAACACCTCAATCCGGC  
 UW-148B: TAAAAACAAAGGATAGCGAGCTCAACACCTCAATCCGGC  
 SHC-0: TAAAAACAAAGGATAGCGAGCTCAACACCTCAATCCGGC  
 SHD-R: TAAAAACAAAGGATAGCGAGCTCAACACCTCAATCCGGC  
 SHE-V: TAAAAACAAAGGATAGCGAGCTCAACACCTCAATCCGGC  
 SHG-I2: TAAAAACAAAGGATAGCGAGCTCAACACCTCAATCCGGC  
 B3: TAAAAACAAAGGATAGCGAGCTCAACACCTCAATCCGGC  
 C3: TAAAAACAAAGGATAGCGAGCTCAACACCTCAATCCGGC  
 K3: TAAAAACAAAGGATAGCGAGCTCAACACCTCAATCCGGC  
 Q3: TAAAAACAAAGGATAGCGAGCTCAACACCTCAATCCGGC  
 SMUTp\_01: TAAAAACAAAGGATAGCGAGCTCAACACCTCAATCCGGC  
 SMUTp\_02: TAAAAACAAAGGATAGCGAGCTCAACACCTCAATCCGGC  
 SMUTp\_04: TAAAAACAAAGGATAGCGAGCTCAACACCTCAATCCGGC  
 SMUTp\_08: TAAAAACAAAGGATAGCGAGCTCAACACCTCAATCCGGC  
 SMUTp\_09: TAAAAACAAAGGATAGCGAGCTCAACACCTCAATCCGGC  
 PT\_SIF0697: TAAAAACAAAGGATAGCGAGCTCAACACCTCAATCCGGC  
 PT\_SIF0877\_3: TAAAAACAAAGGATAGCGAGCTCAACACCTCAATCCGGC  
 PT\_SIF0908: TAAAAACAAAGGATAGCGAGCTCAACACCTCAATCCGGC  
 PT\_SIF0954: TAAAAACAAAGGATAGCGAGCTCAACACCTCAATCCGGC  
 PT\_SIF1002: TAAAAACAAAGGATAGCGAGCTCAACACCTCAATCCGGC  
 PT\_SIF1020: TAAAAACAAAGGATAGCGAGCTCAACACCTCAATCCGGC  
 PT\_SIF1063: TAAAAACAAAGGATAGCGAGCTCAACACCTCAATCCGGC  
 PT\_SIF1127: TAAAAACAAAGGATAGCGAGCTCAACACCTCAATCCGGC  
 PT\_SIF1135: TAAAAACAAAGGATAGCGAGCTCAACACCTCAATCCGGC  
 PT\_SIF1140: TAAAAACAAAGGATAGCGAGCTCAACACCTCAATCCGGC  
 PT\_SIF1142: TAAAAACAAAGGATAGCGAGCTCAACACCTCAATCCGGC  
 PT\_SIF1156: TAAAAACAAAGGATAGCGAGCTCAACACCTCAATCCGGC  
 PT\_SIF1167: TAAAAACAAAGGATAGCGAGCTCAACACCTCAATCCGGC  
 PT\_SIF1183: TAAAAACAAAGGATAGCGAGCTCAACACCTCAATCCGGC  
 PT\_SIF1196: TAAAAACAAAGGATAGCGAGCTCAACACCTCAATCCGGC  
 PT\_SIF1200: TAAAAACAAAGGATAGCGAGCTCAACACCTCAATCCGGC  
 PT\_SIF1242: TAAAAACAAAGGATAGCGAGCTCAACACCTCAATCCGGC  
 PT\_SIF1252: TAAAAACAAAGGATAGCGAGCTCAACACCTCAATCCGGC  
 PT\_SIF1261: TAAAAACAAAGGATAGCGAGCTCAACACCTCAATCCGGC  
 PT\_SIF1278: TAAAAACAAAGGATAGCGAGCTCAACACCTCAATCCGGC  
 PT\_SIF1280: TAAAAACAAAGGATAGCGAGCTCAACACCTCAATCCGGC  
 PT\_SIF1299: TAAAAACAAAGGATAGCGAGCTCAACACCTCAATCCGGC  
 PT\_SIF1348: TAAAAACAAAGGATAGCGAGCTCAACACCTCAATCCGGC  
 PT\_SIF0751: TAAAAACAAAGGATAGCGAGCTCAACACCTCAATCCGGC  
 PT\_SIF0857: TAAAAACAAAGGATAGCGAGCTCAACACCTCAATCCGGC  
 Amoy: TAAAAACAAAGGATAGCGAGCTCAACACCTCAATCCGGC

**b**

Nichols-clade strains

SS14-clade strains

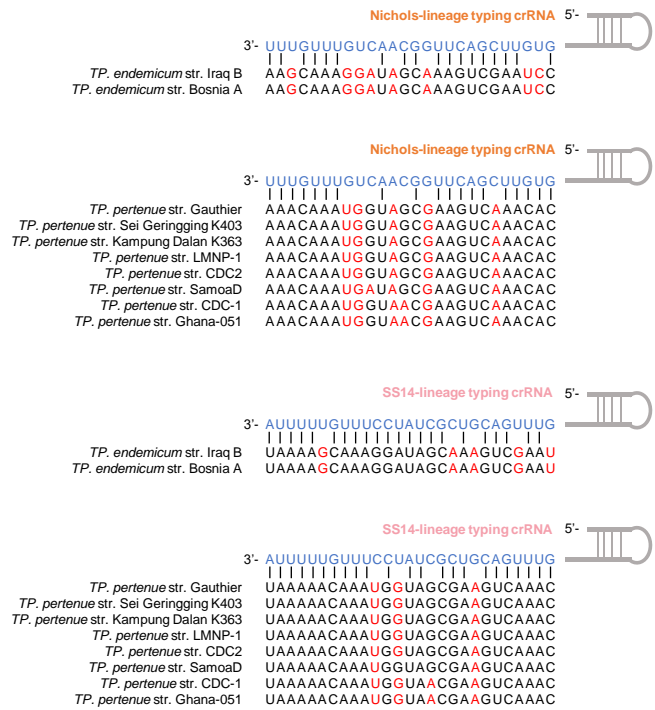

**Figure S6. Target sequences of crRNAs used for determination of *Treponema pallidum* subsp. *pallidum* lineage.** **a** The variable region of *tp0548* in Nichols- and SS14-clade strains was used to design crRNAs for lineage determination. **b** Compared to the closely related pathogenic treponemes *Treponema pallidum* subsp. *endemicum* (TEN) and *Treponema pallidum* subsp. *pertenuae* (TPE), multiple mismatches were present in Nichols- and SS14-lineage typing crRNAs targeting the *tp0548* locus and are expected to yield *TPA* specificity.

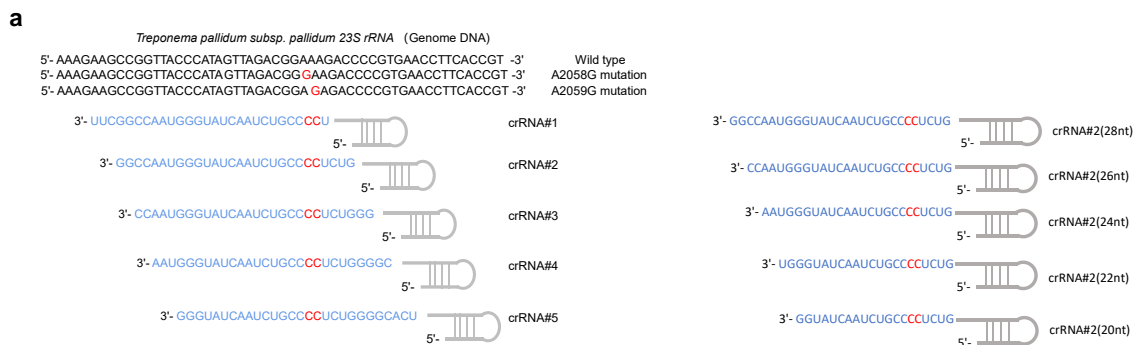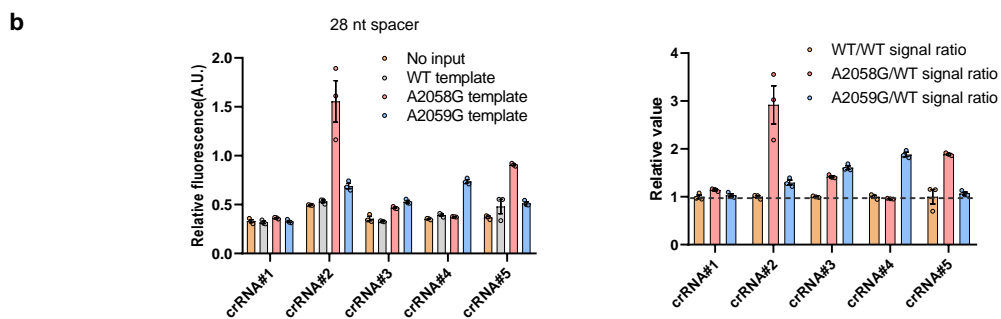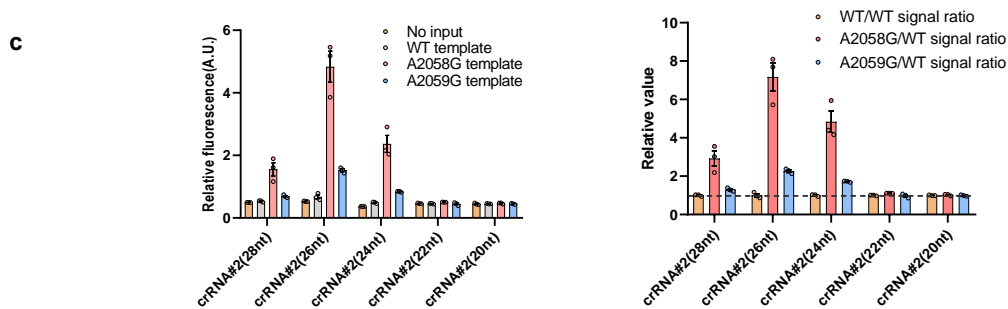

**Figure S7. crRNAs screened for genotyping *Treponema pallidum* 23S rRNAs.** **a** Synthetic crRNAs with mismatches used in this study. **b** Collateral cleavage activity on 23S rRNA for 28 nt spacer crRNAs with different synthetic mismatches (labeled #1-5). Specificity ratios are calculated as the ratio of the on-target RNA (A2058G or A2059G mutation) collateral cleavage to the off-target RNA (wildtype). **c** Collateral cleavage activity on 23S rRNA for crRNA#2 with different lengths (20-28 nt spacer crRNAs). Specificity ratios are calculated as the ratio of collateral cleavage of the on-target (A2058G or A2059G mutation) to off-target (wild-type) RNAs.  $n = 3$  technical replicates; error bars represent mean  $\pm$  SEM. Abbreviations: A.U., Arbitrary units. Source data are provided as a Source Data file.
